# Supplementary material for: Clinical report: one year of treatment of Proteus syndrome with miransertib (ARQ 092)
Source: PubMed Central journal article supplement — Cold Spring Harb Mol Case Stud. 2020 Feb;6(1):a004549. doi: 10.1101/mcs.a004549 (PMC6996520; doi:10.1101/mcs.a004549), 2020-02

## Supplements 2a and 2b

### Supplement 2a Circulating biomarkers

| Date                                            | 23/02/2018 | 15/06/2018 | 27/06/2018 | 16/07/2018 | 13/08/2018 | 24/08/2018 | 17/09/2018 | 15/10/2018 | 12/11/2018 | 10/12/2018 | 14/01/2019 | 5/02/2019 | 11/03/2019 | 10/04/2019 | 6/05/2019 | 3/06/2019 |
|-------------------------------------------------|------------|------------|------------|------------|------------|------------|------------|------------|------------|------------|------------|-----------|------------|------------|-----------|-----------|
| Hemoglobin g/L (130-180)                        | 123        | 127        | 136        | 139        | 142        | 137        | 135        | 140        | 137        | 138        | 135        | 140       | 134        | 126        | 126       | 132       |
| Mean Corpuscular Volume fL (80-100)             | 93         | 93         | 93         | 93         | 93         | 93         | 91         | 93         | 92         | 92         | 93         | 92        | 93         | 91         | 91        | 91        |
| Platelets 10 <sup>9</sup> /L (150-400)          | 185        | 184        | 212        | 205        | 196        | 182        | 184        | 199        | 186        | 186        | 174        | 195       | 210        | 202        | 200       | 215       |
| White Blood Cells 10 <sup>9</sup> /L (4.0-11.0) | 5.0        | 6.4        | 6.3        | 7.6        | 5.1        | 6.7        | 6.4        | 5.1        | 5.7        | 5.3        | 5.4        | 6.6       | 5.5        | 6.1        | 5.1       | 6.8       |
| Neutrophils 10 <sup>9</sup> /L (2.0-8.0)        | 2.6        | 3.7        | 3.6        | 4.8        | 3.0        | 3.8        | 3.6        | 2.6        | 3.4        | 2.5        | 2.7        | 3.6       | 2.6        | 3.4        | 2.2       | 3.9       |
| Lymphocytes 10 <sup>9</sup> /L (1.0-4.0)        | 2.0        | 2.1        | 2.1        | 2.0        | 1.7        | 2.2        | 2.1        | 1.9        | 1.8        | 2.3        | 2.1        | 2.2       | 2.1        | 2.0        | 2.2       | 2.1       |
| Monocytes 10 <sup>9</sup> /L (0.2-1.0)          | 0.3        | 0.5        | 0.5        | 0.6        | 0.3        | 0.5        | 0.5        | 0.4        | 0.3        | 0.4        | 0.3        | 0.5       | 0.3        | 0.3        | 0.3       | 0.5       |
| Eosinophils 10 <sup>9</sup> /L (<0.5)           | 0.1        | 0.1        | 0.1        | 0.2        | 0.1        | 0.2        | 0.2        | 0.1        | 0.1        | 0.1        | 0.3        | 0.3       | 0.6        | 0.4        | 0.4       | 0.3       |
| Sodium mmol/L (135-145)                         | 140        | 140        | 140        | 143        | 143        | 141        | 143        | 145        | 143        | 145        | 142        | 142       | 143        | 142        | 141       | 143       |
| Potassium mmol/L (3.5-5.2)                      | 4.4        | 3.7        | 4.7        | 4.6        | 5.1        | 4.3        | 4.6        | 4.4        | 4.3        | 4.3        | 4.5        | 4.1       | 5.0        | 4.2        | 3.7       | 4.2       |
| Chloride mmol/L (95-110)                        | 104        | 100        | 101        | 104        | 103        | 102        | 104        | 104        | 104        | 105        | 105        | 101       | 104        | 103        | 104       | 103       |
| Bicarbonate mmol/L (22-32)                      | 28         | 32         | 31         | 29         | 31         | 30         | 32         | 30         | 31         | 34         | 29         | 32        | 32         | 31         | 28        | 33        |
| Urea mmol/L (3.5-8.0)                           | 3.5        | 4.4        | 3.3        | 3.6        | 4.2        | 4.1        | 4.6        | 3.6        | 4.2        | 5.0        | 3.9        | 5.7       | 4.1        | 4.0        | 4.0       | 3.7       |
| Creatinine µmol/L (60-110)                      | 51         | 50         | 52         | 58         | 59         | 59         | 54         | 58         | 57         | 61         | 58         | 70        | 61         | 60         | 51        | 58        |
| Anion gap mmol/L (7-17)                         | 12         | 12         | 13         | 15         | 14         | 13         | 12         | 15         | 12         | 10         | 12         | 13        | 12         | 12         | 13        | 11        |
| Calcium mmol/L (2.10-2.60)                      | 2.34       | 2.33       | 2.51       | 2.46       | 2.63       | 2.45       | 2.50       | 2.50       | 2.49       | 2.47       | 2.45       | 2.53      | 2.58       | 2.46       | 2.41      | 2.48      |
| Calcium corrected mmol/L (2.10-2.60)            | 2.34       | 2.37       | 2.47       | 2.41       | 2.54       | 2.43       | 2.48       | 2.43       | 2.44       | 2.38       | 2.40       | 2.42      | 2.54       | 2.42       | 2.41      | 2.46      |
| Magnesium mmol/L (0.70-1.10)                    | 0.76       | 0.77       | 0.74       | 0.80       | 0.83       | 0.76       | 0.75       | 0.84       | 0.78       | 0.84       | 0.82       | 0.86      | 0.81       | 0.76       | 0.79      | 0.83      |
| Phosphate mmol/L (0.75-1.50)                    | 1.08       | 1.27       | 1.32       | 1.15       | 1.30       | 1.19       | 1.20       | 1.25       | 1.20       | 1.19       | 1.11       | 1.36      | 1.23       | 1.22       | 1.07      | 1.20      |
| Total Protein g/L (60-80)                       | 71         | 72         | 74         | 73         | 78         | 72         | 72         | 74         | 73         | 74         | 72         | 76        | 72         | 69         | 68        | 69        |
| Albumin g/L (31-47)                             | 40         | 38         | 42         | 43         | 45         | 41         | 41         | 44         | 43         | 45         | 43         | 46        | 42         | 42         | 40        | 41        |
| Bilirubin µmol/L (<20)                          | 10         | 6          | 16         | 12         | 13         | 12         | 13         | 12         | 12         | 10         | 9          | 11        | 9          | 11         | 8         | 9         |
| Gamma GT U/L (5-50)                             | 14         | 22         | 20         | 19         | 21         | 18         | 26         | 20         | 18         | 18         | 17         | 18        | 18         | 19         | 17        | 22        |
| Alkaline phosphatase U/L (45-150)               | 109        | 110        | 111        | 108        | 106        | 98         | 92         | 98         | 89         | 88         | 76         | 83        | 87         | 78         | 78        | 86        |
| ALT U/L (<50)                                   | 15         | 19         | 19         | 20         | 21         | 19         | 18         | 14         | 16         | 21         | 16         | 16        | 14         | 13         | 14        | 20        |
| AST U/L (<45)                                   | 30         | 29         | 44         | 34         | 35         | 35         | 26         | 27         | 31         | 36         | 29         | 30        | 27         | 26         | 30        | 30        |
| Urate mmol/L (0.20-0.42)                        | 0.18       | 0.23       | 0.20       | 0.22       | 0.25       | 0.24       | 0.21       | 0.25       | 0.23       | 0.26       | 0.21       | 0.22      | 0.20       | 0.21       | 0.17      | 0.24      |
| Fasting glucose mmol/L (3.5-5.4)                | 4.1        | 3.8        | 4.1        | 4.2        | 4.3        | 4.5        | 4.4        | 4.6        | 4.6        | 4.2        | 4.8        | 4.3       | 4.5        | 4.7        | 4.6       | 4.7       |
| Fasting cholesterol mmol/L (<5.5 mmol/L)        | 2.9        | 2.9        | 2.9        | 3.0        | 3.1        | 3.1        | 3.1        | 3.2        | 3.2        | 3.0        | 3.2        | 3.2       | 3.0        | 3.2        | 3.2       | 3.3       |
| Triglycerides mmol/L (<2.0 mmol/L)              | 0.44       | 0.54       | 0.39       | 0.48       | 0.37       | 0.41       | 0.40       | 0.37       | 0.38       | 0.41       | 0.55       | 0.49      | 0.41       | 0.40       | 0.46      | 0.41      |
| D dimer (<0.50 mg/L) 1.3 on Jul 2 2013          |            |            |            |            |            |            |            |            |            |            |            |           | 1.8        |            | 1.5       | 2.1       |
| Fibrinogen (2.0-4.0 g/L) 3.2 on Jul 2 2013      |            |            |            |            |            |            |            |            |            |            |            |           | 3.7        |            | 3.1       | 3.1       |

### Supplement 2b Trends in serum alkaline phosphatase and fasting plasma glucose and cholesterol levels

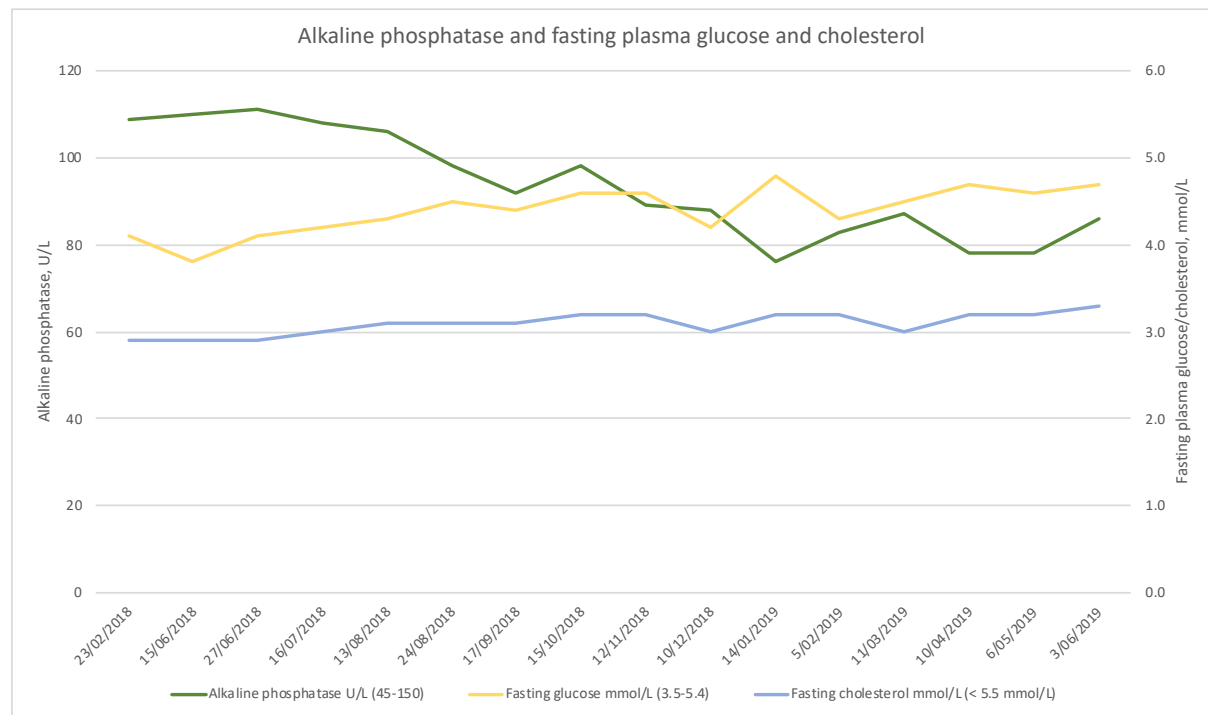

Supplement: supp_mcs.a004549_Supplemental_Fig2ab.pdf [file supp_mcs.a004549_Supplemental_Fig2ab.pdf]
