# Supplementary material for: Clinical report: one year of treatment of Proteus syndrome with miransertib (ARQ 092)
Source: PubMed Central journal article supplement — Cold Spring Harb Mol Case Stud. 2020 Feb;6(1):a004549. doi: 10.1101/mcs.a004549 (PMC6996520; doi:10.1101/mcs.a004549), 2020-02
Supplement: supp_mcs.a004549_Supplemental_Fig1.pdf [file supp_mcs.a004549_Supplemental_Fig1.pdf]

## Supplement 1

Vineland Adaptive Behavior Scales, Interview Edition (Standardised with mean 100, 95% confidence interval  $\pm 15$ )

| <b>Skill type</b> | <b>Standardised score <math>\pm</math><br/>SD</b> | <b>Centile rank</b> |
|-------------------|---------------------------------------------------|---------------------|
| Communication     | 69 $\pm$ 9                                        | 2                   |
| Daily Living      | 66 $\pm$ 9                                        | 1                   |
| Socialization     | 70 $\pm$ 10                                       | 2                   |
| Motor             | 61 $\pm$ 13                                       | 0.5                 |
| Composite         | 61 $\pm$ 6                                        | 0.5                 |
