# Supplementary material for: Clinical report: one year of treatment of Proteus syndrome with miransertib (ARQ 092)
Source: PubMed Central journal article supplement — Cold Spring Harb Mol Case Stud. 2020 Feb;6(1):a004549. doi: 10.1101/mcs.a004549 (PMC6996520; doi:10.1101/mcs.a004549), 2020-02

**Supplement 3. Impact of pediatric illness (IPI) scale questionnaire results: baseline April 21, 2018 and followup March 12 2019 after 12 months treatment.**

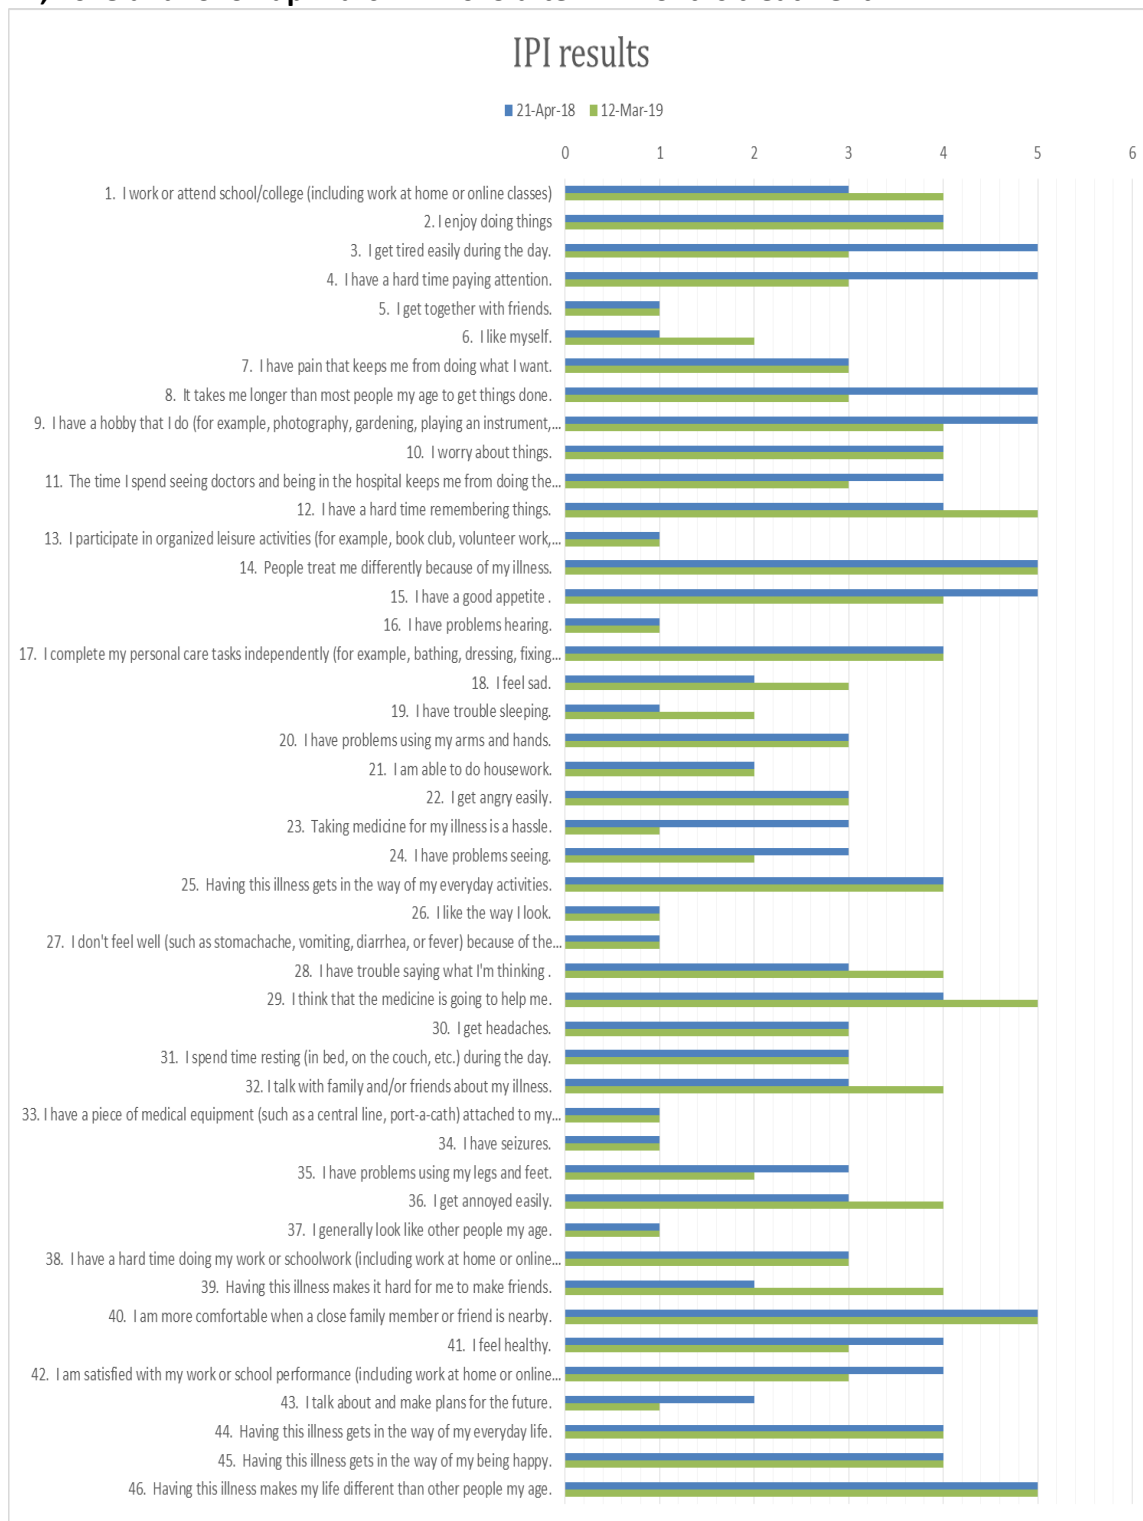

Supplement: supp_mcs.a004549_Supplemental_Fig3.pdf [file supp_mcs.a004549_Supplemental_Fig3.pdf]
