# Supplementary figures and images for: Clinical report: one year of treatment of Proteus syndrome with miransertib (ARQ 092)
Source: PubMed Central journal article supplement — Cold Spring Harb Mol Case Stud. 2020 Feb;6(1):a004549. doi: 10.1101/mcs.a004549 (PMC6996520; doi:10.1101/mcs.a004549), 2020-02

## Supplement 4: Pain Interference Index Self Report results

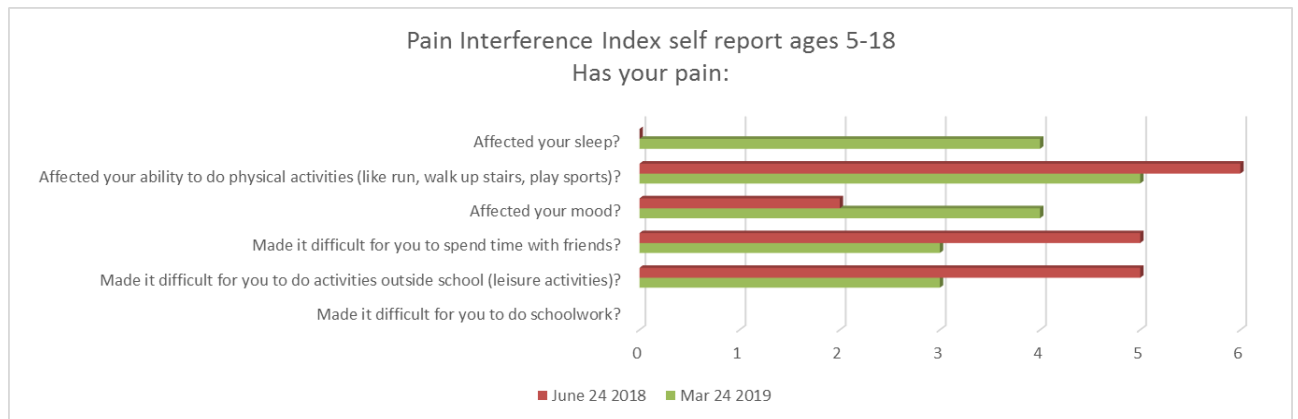

Supplement: supp_mcs.a004549_Supplemental_Fig4.pdf [file supp_mcs.a004549_Supplemental_Fig4.pdf]

## Supplement 5: Self-Report Pain Intensity Questionnaire (for participants ages 10 years +)

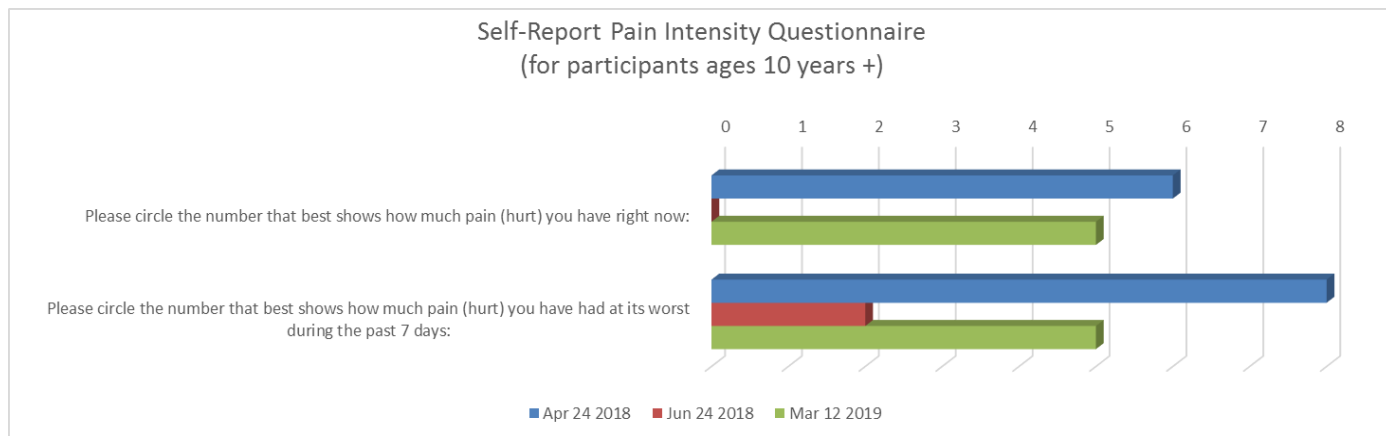

Supplement: supp_mcs.a004549_Supplemental_Fig5.pdf [file supp_mcs.a004549_Supplemental_Fig5.pdf]
